# Supplementary material
Source: PubMed Central journal article supplement (PMC3861723)

## Supplementary Figure 2

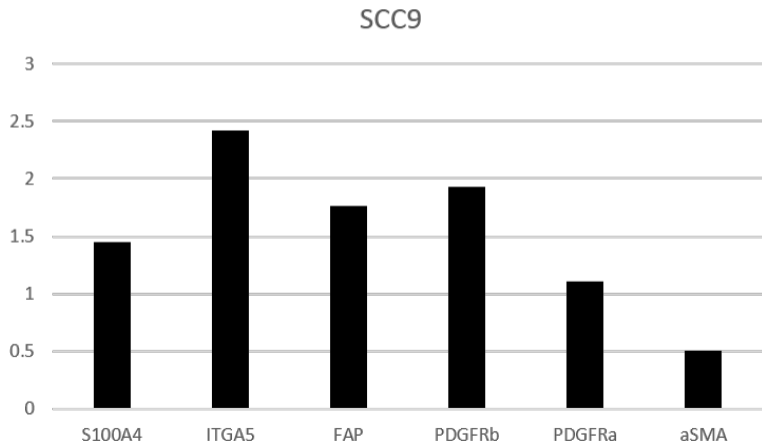

Supplement: supp_M113.029587_mcp.M113.029587-3.pdf [file supp_M113.029587_mcp.M113.029587-3.pdf]
